# Supplementary material
Source: publisher site journal article supplement (https://www.dovepress.com/article/547884)
Supplement: Supplementary file 1 [file Supplemental%20file%201.docx]

# **Supplemental file 1. Interview guide** 1. On a scale from 1-10, how much concern does there exists with the health professionals from wards A1 (surgery) or B2 (lung disease and cardiology) on malnutrition being underestimated with screening with the SNAQ, where 1 is no concern and 10 is a lot of concern. Can you explain why it is at that level?

*I am going to ask you about the efforts of the current health professionals to address the problem underestimation of the prevalence of malnutrition risk. With efforts, I mean all programs, activities, of services of the health professionals to address the problem (underestimation) of malnutrition.*

2. Are there efforts from the health professionals to address the underestimation of malnutrition risk?
*If Yes, continue to question 3; if No, skip to question 16.*

3. Can you shortly describe these?

4. How long have each of these efforts been going on? *Make sure that each program/activity is named.*

5. Who do each of these efforts serve (eg, a certain age group, patient group, etc.)?

6. Approximately, how many health professionals are aware of these efforts? Would you say none, a few, some, or most. Why do you say…..?

7. Of the ones that are aware of the efforts, what do they know about it? Do they know the intention of the efforts?
Do they know for who the efforts are meant?
Do they know what it does?
Do they know about the effectivity of the efforts?

8. Are there misconceptions or incorrect information under the health professionals about the current efforts? If yes: what are these?9. How do the health professionals learn about the current efforts?

10. Do the health professionals view the current efforts as successful?
What do the health professionals like about these programs?
What do they not like?

11. What are the obstacles to individuals participating in these efforts?

12. What are the strengths of these efforts?

13. What are the weaknesses of these efforts?

15. *Is there a schedule for additional efforts to address the problem of underestimating malnutrition risk in the hospital?*

16 Is there someone of the health professionals or hospital staff that tries to start something new to address (the underestimation of) malnutrition risk? Can you tell me something about that?

I will now ask about how the leadership in the hospital perceives the problem of underestimation of the risk of malnutrition. With leadership, we mean the board and management team that can influence the outcome of the problem underestimation of malnutrition risk and who have influence with the health professionals to achieve their goals.

17. On a scale of 1-10, how much of a concern is underestimation of malnutrition risk to the leadership of the hospital staff, where 1 means no concern and 10 means a lot of concern. Can you tell me why it is a …?

18. How much priority does the problem underestimation of risk of malnutrition gets from the leadership in the hospital? Can you explain why you say this?

19. Does the leadership support the current efforts to address the problem underestimation of malnutrition ?
Are they involved in a commission?
Do they speak it out in public?
Do they allocate resources to address the problem?

20. Would the leadership support extra efforts in the hospital to address the problem of underestimation of malnutrition? If yes, how would they show their support? For example, by passive support, or more active support, by being involved in the planning, or by taking part in the efforts?
Would they publicly speak out in favour of the new efforts?
Would they directly take part in the planning of the implementation of the new efforts?
Would they appoint resources for the new efforts?
21. Who are the leaders that support addressing the underestimation of malnutrition to the health professionals?

22. Are there leaders that might be against addressing underestimation of malnutrition? Who are these?
23. On a scale from 1-10, how much of a concern is underestimating malnutrition risk to the hospital staff?

24. How much of a priority is addressing underestimating the risk of malnutrition to the hospital staff?

25. Does the hospital staff support the current efforts? If yes, how do they show their support? For example, is it more passive support or are they actively involved with the planning or with participation of the efforts?

26. Does the hospital staff think that the extra efforts are needed from the hospital staff. If yes, under what kind of circumstances would they support extra efforts? How would they show their support for more efforts? (For example, would they get involved with the planning or participate with the efforts or would their support be passive?)

27. What are the primary obstacles to address the underestimation of malnutrition risk?

30. On a scale of 1-10, where a 1 is no knowledge and a 10 is detailed knowledge, how

much does the hospital staff know about (underestimation of) malnutrition risk?
31. Would you say the health professionals know a lot, some, a little, or nothing about the following with regards to underestimating the risk of malnutrition.

- Causes *(Ask if needed with ‘much, some, a little or nothing’)*
- Effects
- Signs and symptoms
- How much underestimation of risk of malnutrition occurs locally
- What can be done to prevent or counteract underestimating risk of malnutrition?
- The effect on friends and family

32. Are there misconceptions among hospital staff member about underestimating malnutrition risk, for example about why does it occur or what are the consequences? If yes, what are the misconceptions?

34. How are the current efforts funded? Will this funding continue in the future?

35. What resources are available to address the problem of underestimating malnutrition risk? Volunteers?
Financial donations from organizations?
Subsidy?
Experts?
Space?

36. Would the hospital staff and leadership support using these resources to address the problem underestimating malnutrition risk? Can you explain this?

37. On a scale from 1 to 10, what is the level of expertise and training among those working on malnutrition risk (with 1 being “very low”, and 10 being “very high”)?
Why do you say it’s a _____?

38. Are you aware of any proposals or action plans that have been submitted for funding to address the problem of underestimating malnutrition risk?
